# Supplementary material
Source: publisher site journal article supplement (https://www.degruyterbrill.com/publication/isbn/9783110183849/downloadAsset/9783110183849_Inhaltsverzeichnis.pdf)
Supplement: Supplementary file 1 [file 9783110183849_Inhaltsverzeichnis.pdf]

## Inhaltsverzeichnis

|                          |     |
|--------------------------|-----|
| Vorwort .....            | V   |
| Benutzungshinweise ..... | IX  |
| Bibelstellen .....       | 1   |
| Orte .....               | 221 |
| Sachen .....             | 487 |
